# Supplementary material for: Schottky diodes based on blue phosphorene nanoribbon homojunctions
Source: Royal Society of Chemistry journal article supplement (doi:10.1039/d2cp04117k), 2022-01-01
Supplement: d2cp04117k1.pdf [file d2cp04117k1.pdf]

## Schottky diodes based on blue phosphorus nanoribbon homojunctions

Yue-Hong Liu, Xiang-Qian Lu, Mi-Mi Dong, Guang-Ping Zhang, Zong-Liang Li,  
Chuan-Kui Wang\*, Xiao-Xiao Fu\*

Shandong Key Laboratory of Medical Physics and Image Processing & Shandong  
Provincial Engineering and Technical Center of Light Manipulations, School of  
Physics and Electronics, Shandong Normal University, Jinan 250358, China

\*Author to whom any correspondence should be addressed. E-mail:  
ckwang@sdnu.edu.cn; fuxiaoxiao@sdnu.edu.cn

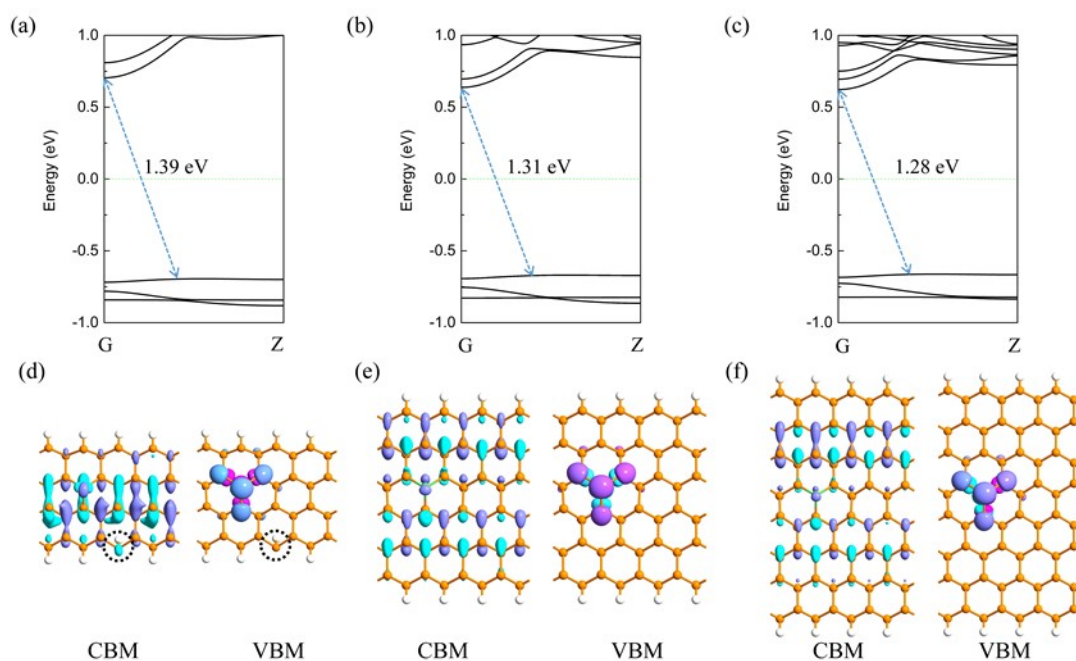

Fig. S1 (a)–(c) The energy band structures and (d)–(f) Bloch states of the Ni-adsorbed H-ZPNR with different widths. The isovalues are fixed as 0.07 e Bohr<sup>-3</sup> for all Bloch states.

Table1 Adsorption energies of the transition metal atoms on the top site of the H-ZPNR

| Transition metal adsorption atom | $E_a$ (eV) |
|----------------------------------|------------|
| Sc                               | -3.04      |
| Ti                               | -3.59      |
| V                                | -2.42      |
| Cr                               | -2.77      |
| Mn                               | -2.25      |
| Fe                               | -3.96      |
| Co                               | -4.86      |
| Ni                               | -5.15      |

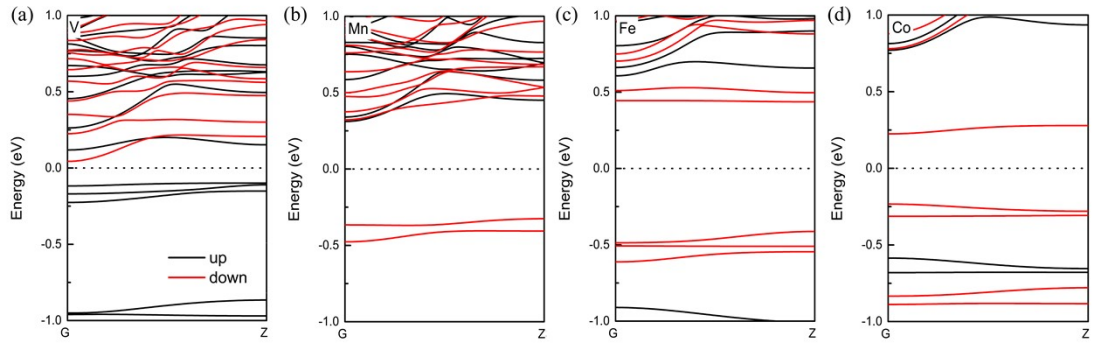

Fig. S2 The band structures of (a) V, (b) Mn, (c) Fe, and (d) Co adsorbed H-ZPNR.

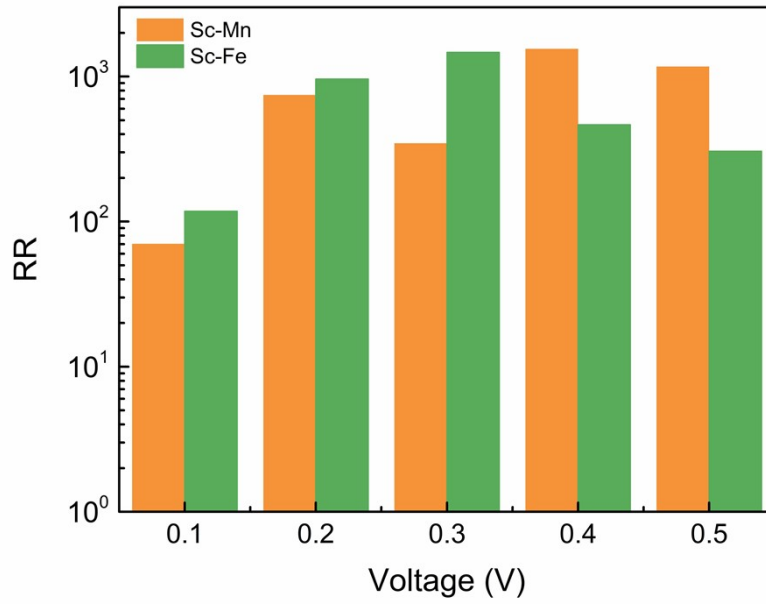

Fig. S3 Rectification ratios of the Sc-Mn and Sc-Fe devices.

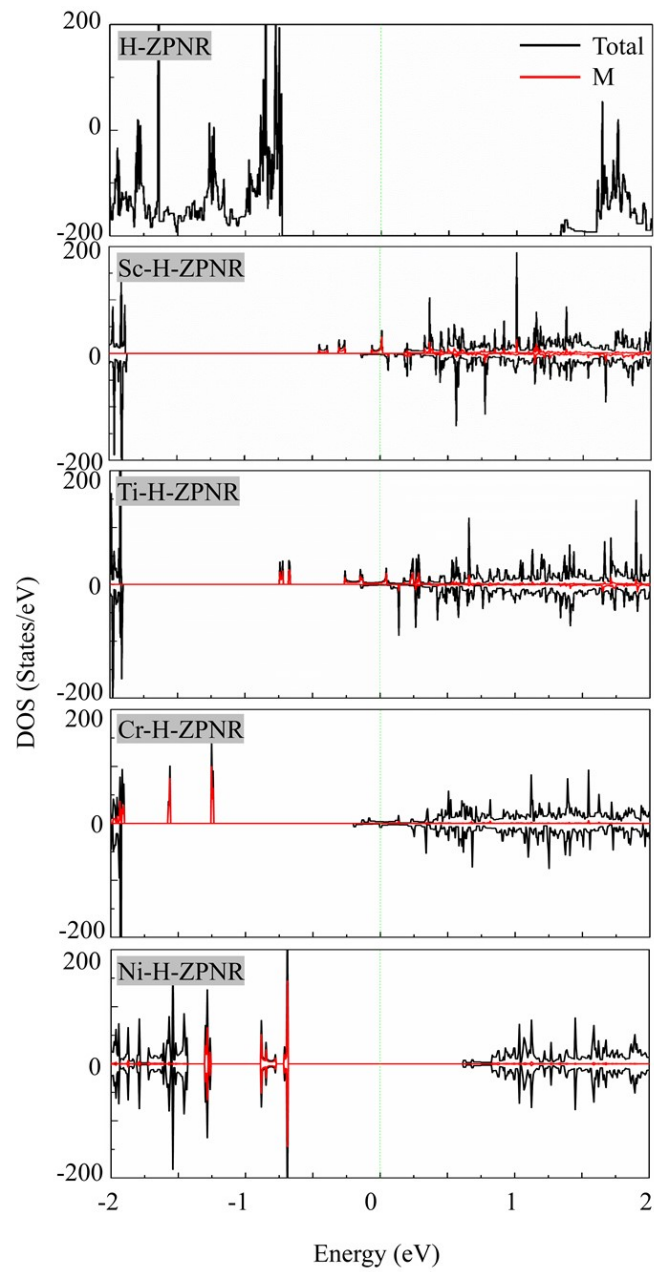

Fig. S4 The projected density of states (PDOS) for H-ZPNR and Sc, Ti, Cr, and Ni adsorbed H-ZPNR.

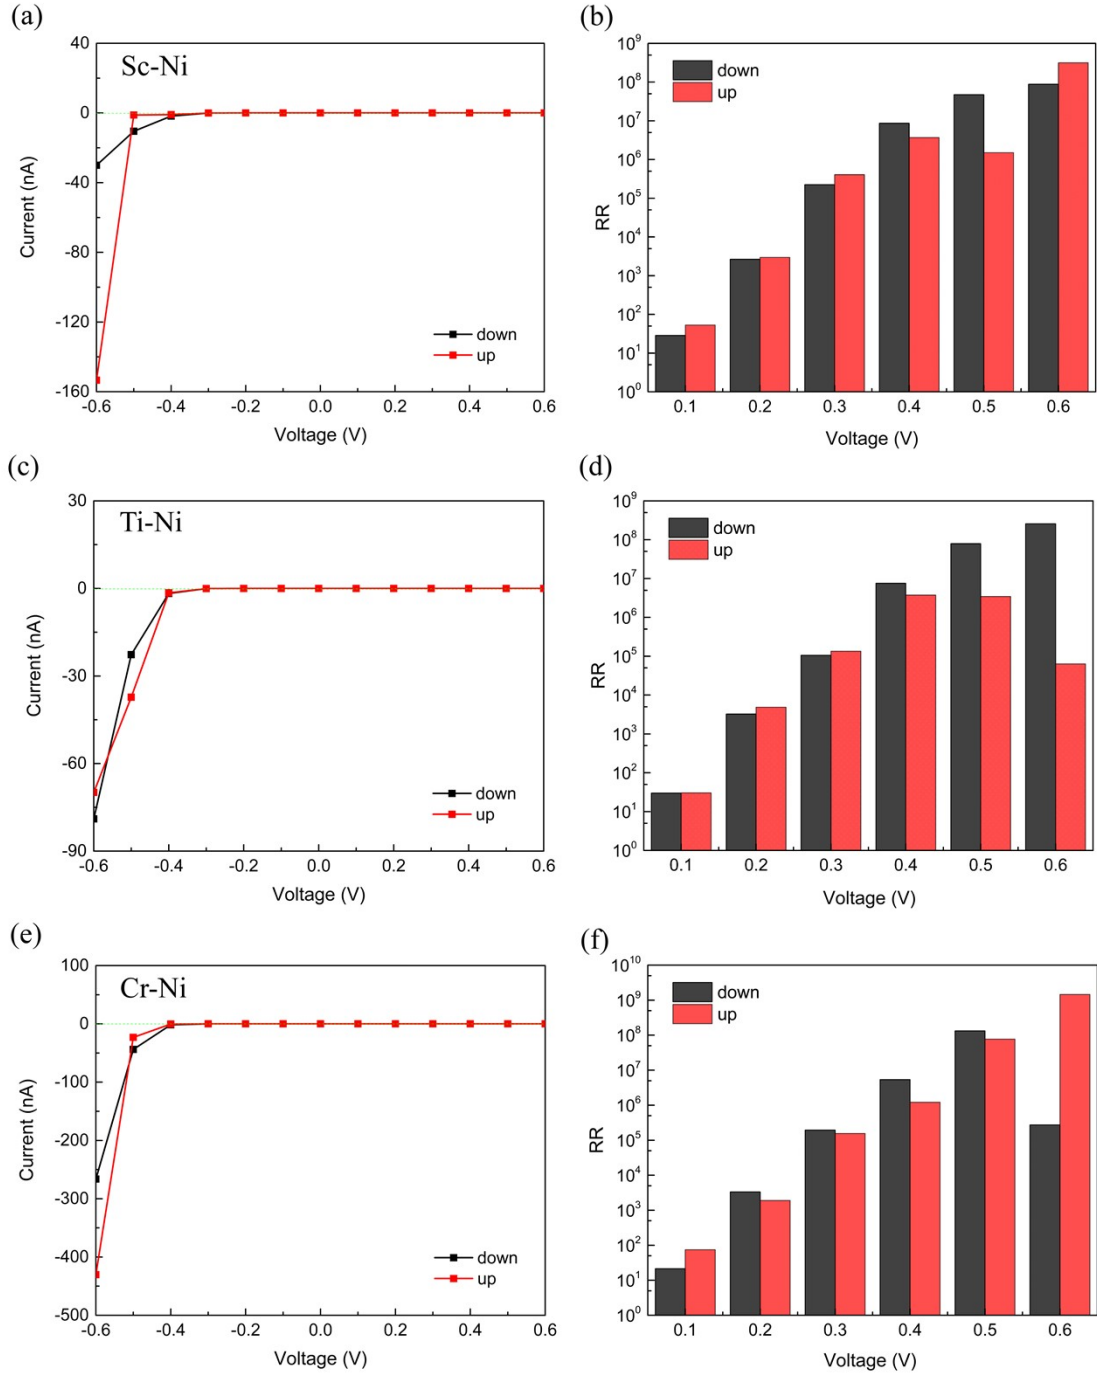

Fig. S5 Spin-dependent  $I$ - $V$  curves and  $RR$  of (a)–(b) Sc–Ni, (c)–(d) Ti–Ni, and (e)–(f) Cr–Ni homojunction devices, respectively.
